# Supplementary material for: Systems pharmacology and molecular docking strategies prioritize natural molecules as cardioprotective agents
Source: Royal Society of Chemistry journal article supplement (doi:10.1039/c5ra10761j), 2015-01-01
Supplement: c5ra10761j4.pdf [file c5ra10761j4.pdf]

**Table 3** Compound targets disease relationship (TCMSP database)

| S.No. | Compound Name | Related diseases                                                                                                              |
|-------|---------------|-------------------------------------------------------------------------------------------------------------------------------|
| 1     | Morin         | Cardiovascular disease (unspecified), Chronic inflammatory diseases                                                           |
| 2     | Piperine      | Cardiac dysrhythmias                                                                                                          |
| 3     | Veratric acid | Cardiovascular disease (unspecified), Chronic inflammatory diseases, Abdominal aortic aneurysm                                |
| 4     | Syringic acid | Heart Failure, Hypertension, Ischemic heart disease                                                                           |
| 5     | Vanillic acid | Abdominal aortic aneurysm                                                                                                     |
| 6     | Diosgenin     | Not-Available                                                                                                                 |
| 7     | Diosmetin     | Ischemia reperfusion injuries, Cardiovascular disease (unspecified), Chronic inflammatory diseases, Abdominal aortic aneurysm |
| 8     | Sinapic acid  | Ischemia reperfusion injuries, Cardiovascular disease (unspecified), Chronic inflammatory diseases, Abdominal aortic aneurysm |
